# Supplementary material
Source: PubMed Central journal article supplement (PMC4346563)
Supplement: EC.00233-14_zek999094404so1.pdf [file EC.00233-14_zek999094404so1.pdf]

**Table S1:** List of candidate genes showing reduced expression levels in the absence of extracellular Ca<sup>2+</sup> and that contain predicted transmembrane domains

| Gene            | FPKM <sup>1</sup><br>VMM | FPKM <sup>1</sup><br>No Ca <sup>2+</sup> | Annotation                                       | TM<br>domains <sup>2</sup> |
|-----------------|--------------------------|------------------------------------------|--------------------------------------------------|----------------------------|
| NCU00306        | 3                        | 1                                        | MFS multidrug transporter F                      | 11                         |
| NCU00720        | 110                      | 48                                       | L-lactate dehydrogenase F                        | 1                          |
| NCU00821        | 35                       | 15                                       | sugar transporter F                              | 10                         |
| NCU00832        | 4                        | 1                                        | hypothetical protein                             | 2                          |
| <b>NCU01289</b> | <b>83</b>                | <b>39</b>                                | <b>hypothetical protein</b>                      | <b>1</b>                   |
| <b>NCU01382</b> | <b>54</b>                | <b>9</b>                                 | <b>hypothetical protein</b>                      | <b>5</b>                   |
| <b>NCU01697</b> | <b>55</b>                | <b>7</b>                                 | <b>hypothetical protein</b>                      | <b>4</b>                   |
| <b>NCU02191</b> | <b>101</b>               | <b>51</b>                                | <b>hypothetical protein</b>                      | <b>1</b>                   |
| <b>NCU03132</b> | <b>108</b>               | <b>40</b>                                | <b>hypothetical protein</b>                      | <b>1</b>                   |
| NCU03192        | 204                      | 101                                      | hypothetical protein                             | 1                          |
| <b>NCU03863</b> | <b>51</b>                | <b>11</b>                                | <b>hypothetical protein</b>                      | <b>4</b>                   |
| NCU04736        | 27                       | 10                                       | Calcium P-type ATPase-2                          | 11                         |
| NCU04872        | 28                       | 7                                        | hypothetical protein                             | 2                          |
| NCU05132        | 7                        | 2                                        | hypothetical protein                             | 13                         |
| NCU05136        | 43                       | 16                                       | endo alpha-1,4 polygalactosaminidase precursor F | 1                          |
| NCU05138        | 9                        | 1                                        | hypothetical protein *                           | 1                          |
| <b>NCU05798</b> | <b>13</b>                | <b>4</b>                                 | <b>hypothetical protein</b>                      | <b>2</b>                   |
| NCU05826        | 90                       | 47                                       | hypothetical protein                             | 1                          |
| NCU05836        | 76                       | 38                                       | glycosyl hydrolase family 47 protein F           | 1                          |
| NCU05915        | 65                       | 23                                       | hypothetical protein                             | 1                          |
| NCU06034        | 171                      | 39                                       | hypothetical protein                             | 4                          |
| NCU06116        | 24                       | 8                                        | hypothetical protein                             | 2                          |
| NCU06130        | 78                       | 21                                       | hypothetical protein                             | 4                          |
| NCU06328        | 33                       | 16                                       | hypothetical protein                             | 6                          |
| NCU06361        | 297                      | 155                                      | Cell wall protein cwl1 required for septation F  | 3                          |
| NCU06380        | 63                       | 29                                       | zinc transporter YKE4 F                          | 8                          |
| NCU07075        | 12                       | 4                                        | calcium/proton exchanger                         | 11                         |
| NCU07235        | 17                       | 2                                        | hypothetical protein                             | 1                          |
| NCU07338        | 44                       | 17                                       | alpha-1,6-mannosyltransferase OCH1 #             | 1                          |
| NCU07388        | 22                       | 9                                        | hypothetical protein#                            | 1                          |
| <b>NCU07582</b> | <b>3</b>                 | <b>1</b>                                 | <b>hypothetical protein</b>                      | <b>1</b>                   |
| NCU07769        | 20                       | 7                                        | hypothetical protein                             | 6                          |
| NCU07802        | 14                       | 1                                        | hypothetical protein                             | 1                          |
| NCU07974        | 178                      | 88                                       | endoglucanase B F                                | 1                          |
| NCU08433        | 10                       | 1                                        | hypothetical protein*                            | 7                          |
| NCU08447        | 10                       | 1                                        | hypothetical protein                             | 7                          |
| <b>NCU08524</b> | <b>2</b>                 | <b>1</b>                                 | <b>hypothetical protein</b>                      | <b>1</b>                   |
| NCU08870        | 44                       | 18                                       | hypothetical protein                             | 1                          |
| NCU09294        | 39                       | 14                                       | hypothetical protein *                           | 1                          |
| NCU09307        | 24                       | 10                                       | Plasma membrane fusion protein LFD1              | 1                          |
| NCU09337        | 46                       | 13                                       | plasma membrane fusion protein PRM1              | 5                          |

|                 |          |          |                             |          |
|-----------------|----------|----------|-----------------------------|----------|
| NCU09562        | 339      | 88       | hypothetical protein        | 1        |
| NCU09852        | 69       | 31       | hypothetical protein        | 2        |
| NCU09909        | 4        | 1        | urea active transporter F   | 15       |
| <b>NCU09955</b> | <b>5</b> | <b>1</b> | <b>hypothetical protein</b> | <b>8</b> |
| NCU10610        | 53       | 4        | hypothetical protein        | 4        |
| NCU11172        | 452      | 71       | hypothetical protein *      | 4        |
| NCU11308        | 98       | 36       | hypothetical protein *      | 2        |
| NCU11733        | 19       | 3        | hypothetical protein *      | 2        |
| NCU12021        | 296      | 39       | hypothetical protein *      | 4        |

<sup>1</sup>Rows that are bolded indicate strains that showed increased lysis of adhered germlings as compared to WT germling pairs ( $p < 0.05$ ).

<sup>2</sup>Data from Goncalves et al., (1); <sup>3</sup>FPKM: fragments per kilobase of exon per million fragments mapped.

<sup>4</sup> TM domains were predicted TMHMM 2.0 (2).

\* Deletion strains not available at the time of this study; # Deletion strains showing conidiation defects; F Deletion strains eliminated based on annotation, such as genes encoding metabolic enzymes or transporters.

## References

1. **Goncalves AP, Monteiro J, Lucchi C, Kowbel DJ, Cordeiro JM, Correia-de-Sa P, Rigden CJ, Glass NL, Videira A.** 2014. Extracellular calcium triggers unique transcriptional programs and modulates staurosporine-induced cell death in *Neurospora crassa*. *Microbial Cell* **1**:289-302.
2. **Krogh A, Larsson B, von Heijne G, Sonnhammer EL.** 2001. Predicting transmembrane protein topology with a hidden Markov model: application to complete genomes. *J Mol Biol* **305**:567-580.

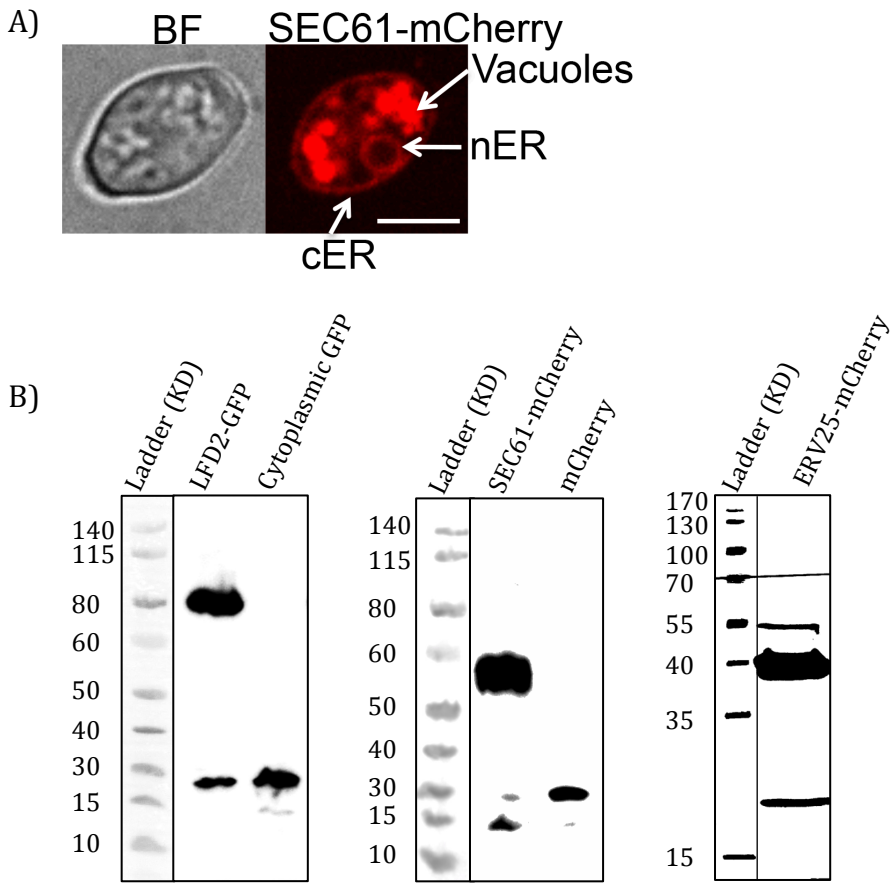

**Figure S1:** A) SEC61-mCherry localization in ungerminated conidia. SEC61 shows both nuclear (nER) and cortical ER (cER) localization as well as vacuolar localization. Scale bar = 5 $\mu$ m. B) Western blots for LFD2-GFP, SEC61-mCherry and ERV25-mCherry, using anti-GFP or anti-mCherry antibodies, respectively. Molecular weight markers are shown on left.
